# Supplementary material for: Surface plasmon enhancement in different spatial distributions of nanowires and two-dimensional materials
Source: Royal Society of Chemistry journal article supplement (doi:10.1039/d1cp05982c), 2022-01-01
Supplement: d1cp05982c1.pdf [file d1cp05982c1.pdf]

## Supplementary Material

### Surface plasmon enhancement in the different spatial distributions of nanowire and two-dimensional material

Chunming Ji<sup>#,1, 2</sup>, Hao Jia<sup>#,2,3</sup>, Chen Zhou<sup>1</sup>, Quan Wang<sup>\*, 2,5</sup>, Wei Xue<sup>\*,1</sup>

- 1 *Institute of laser and optoelectronic intelligent manufacturing, Institute of Laser and Optoelectronics Intelligent Manufacturing, Wenzhou University, Wenzhou University, Wenzhou 325035, P. R. China*
- 2 *Zhenjiang key laboratory of advanced sensing materials and devices, School of Mechanical Engineering, Jiangsu University, Zhenjiang 212013, P.R. China*
- 3 *Institute for Quantum Science and Engineering and Department of Physics, Southern University of Science and Technology, Shenzhen 518055, P. R. China*
- 4 *Guangdong Provincial Key laboratory of Quantum Science and Engineering, Southern University of Science and Technology, Shenzhen 518055, P. R. China*
- 5 *State Key Laboratory of Transducer Technology, Chinese Academy of Sciences, Shanghai 200050, China*

#These authors contributed equally: Chunming Ji, Hao Jia.

\* Address correspondence to wangq@ujs.edu.cn (Quan Wang) and xw@wzu.edu.cn (Wei Xue).

#### **Table of contents**

**Section S1. SEM images of Ag nanowires.**

**Section S2. Fabrication process of the Ag/MoS<sub>2</sub> structures.**

**Section S3. Photoelectric performance of the pristine 1L MoS<sub>2</sub> phototransistor**

**Section S1. SEM images of Ag nanowires.**

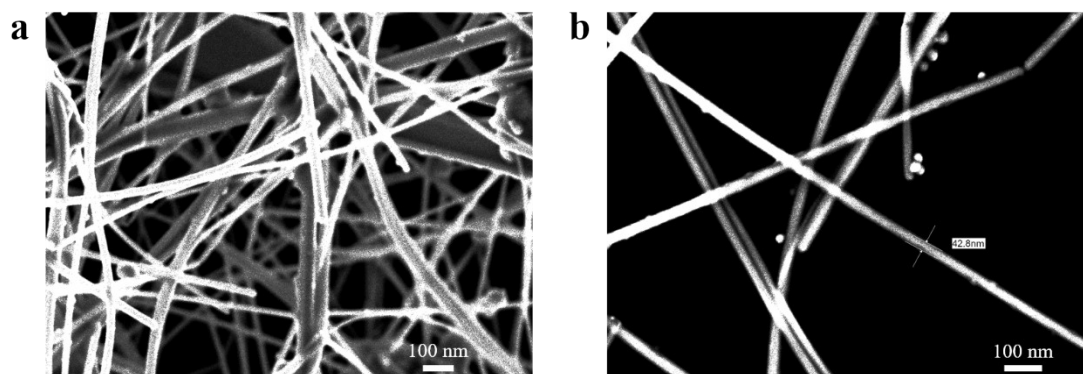

**Figure S1. SEM images of Ag NWs synthesized by the polyol method.**

**Section S2. Fabrication process of the Ag/MoS<sub>2</sub> structures.**

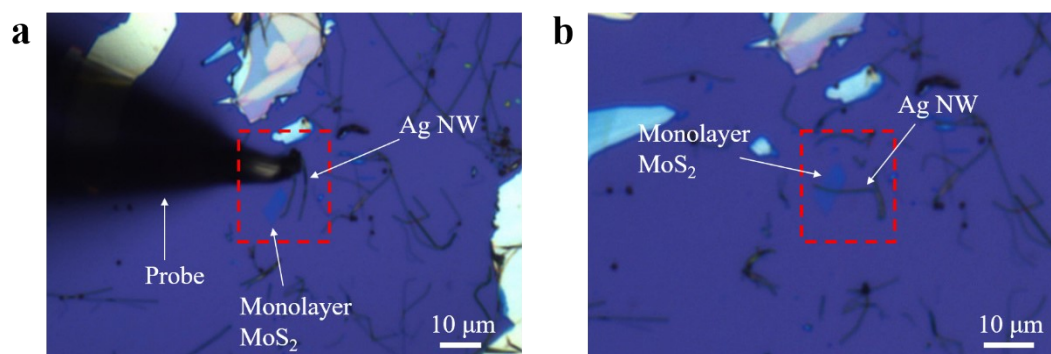

**Figure S2. Optical microscope (OM) images of dragging an Ag NW onto the top of 1L MoS<sub>2</sub> with a probe of a probe station. The red dashed frame is the operating area of the samples.**

### Section S3. Photoelectric performance of the pristine 1L MoS<sub>2</sub> phototransistor

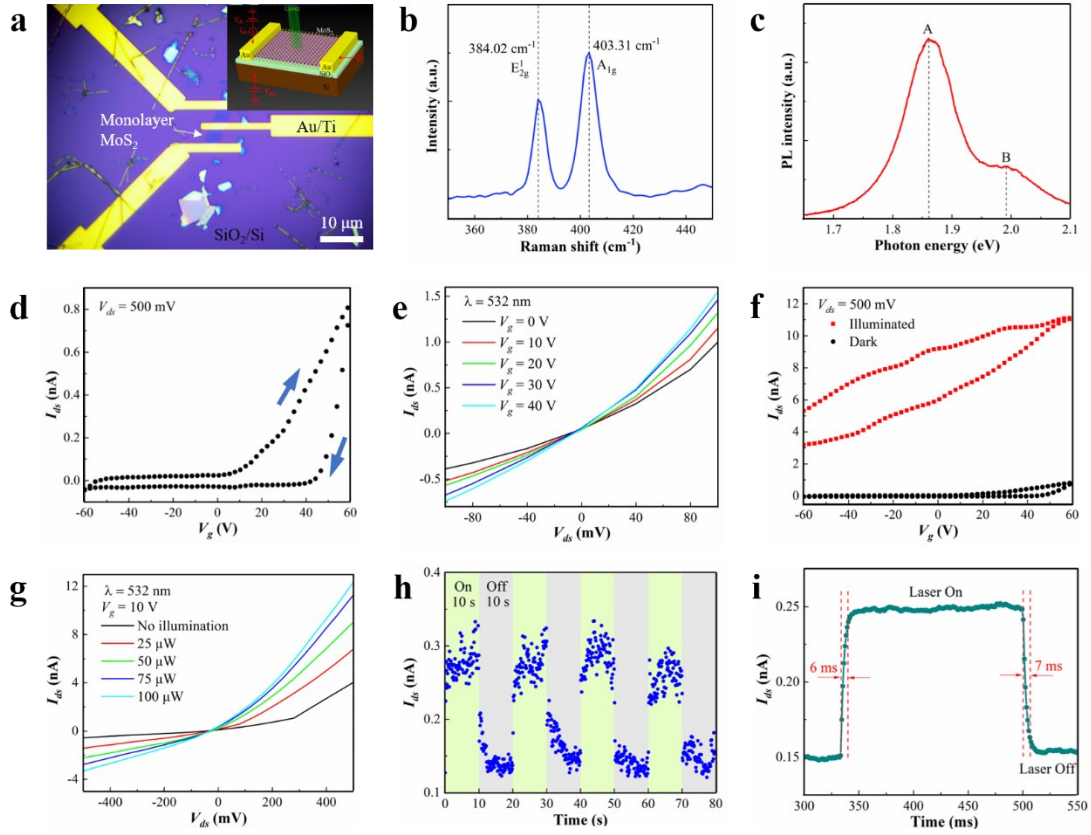

**Figure S3. Photoelectric performance of the pristine 1L MoS<sub>2</sub> phototransistor. (a) OM image of the pristine 1L MoS<sub>2</sub> phototransistor, the inset is a schematic diagram of the photoelectric measurement of it. (b) Raman spectrum of the 1L MoS<sub>2</sub> in the channel. (c) PL spectrum of the 1L MoS<sub>2</sub> in the channel. (d) Transfer characteristic curve without light. (e) Output characteristic curves under light. (f) Transfer characteristic curves with and without light. (g) Output characteristic curves under the light of different power. (h) Optical switching response of photocurrent with time. (i) Time-resolved photo response speed.**

Figure S3a shows the OM image of the phototransistor based on the pristine 1L MoS<sub>2</sub> that exfoliated in the same batch, the upper right inset is a schematic diagram of the photoelectric measurement of it. Figure S3b shows the Raman spectrum of the

MoS<sub>2</sub> sample in the channel. The peak position of E<sub>2g</sub><sup>1</sup> was 384.02 cm<sup>-1</sup>, and the peak position of A<sub>1g</sub> was 403.31 cm<sup>-1</sup>. The peak position difference between them was 19.29 cm<sup>-1</sup>, which is less than 20 cm<sup>-1</sup>, indicating that the sample was a monolayer MoS<sub>2</sub>.<sup>1,2</sup> Figure S3c shows the PL spectrum of the MoS<sub>2</sub> sample in the channel. The spectrum had two significant luminescence peaks near 1.86 eV and 1.99 eV, which further proved that the sample was a monolayer MoS<sub>2</sub>.<sup>3</sup> The transfer and output characteristic curves in Figure (S3d, e) indicated that the V<sub>g</sub> had a modulating effect on the carrier concentration and an ohmic contact was formed. According to the data shown in Figure (S3f, g), The photoresponsivity and photo detectivity of the pristine 1L MoS<sub>2</sub> phototransistor were calculated as 0.10 mA/W and 2.5×10<sup>4</sup> Jones, respectively. A reliable switching behavior can be observed with an on/off time of 10 s, as shown in Figure (S3h). In addition, Figure S3i shows that the rising edge and descending edge of the pristine 1L MoS<sub>2</sub> phototransistor were 6 ms and 7 ms, respectively, which was consistent with the photo response speed of the 1L MoS<sub>2</sub> photodetector reported in the relevant literature.<sup>4,5</sup>

## Supplementary References

- [1] Q. H. Wang, K. Kalantarzadeh, A. Kis, *et al.* Electronics and optoelectronics of two-dimensional transition metal dichalcogenides. *Nat. Nanotechnol.* **2012**, 7 (11), 699-712.
- [2] H. Li, Q. Zhang, C. C. Yap, *et al.* From bulk to monolayer MoS<sub>2</sub>: evolution of Raman scattering. *Adv. Funct. Mater.* **2012**, 22 (7), 1385-1390.
- [3] A. Splendiani, L. Sun, Y. Zhang, *et al.* Emerging photoluminescence in monolayer MoS<sub>2</sub>. *Nano Lett.* **2010**, 10 (4), 1271-1275.
- [4] Z. Yin, H. Li, H. Li, *et al.* Single-layer MoS<sub>2</sub> phototransistors. *ACS Nano* **2012**, 6 (1), 74-80.
- [5] O. Lopez-Sanchez, D. Lembke, M. Kayci, *et al.* Ultrasensitive photodetectors based on monolayer MoS<sub>2</sub>. *Nat. Nanotechnol.* **2013**, 8 (7), 497–501.
